# Supplementary material
Source: PubMed Central journal article supplement (PMC3722875)
Supplement: NIHMS488744-supplement-01.pdf [file NIHMS488744-supplement-01.pdf]

**Supplementary Table 1: Patient Demographics**

| <b>Variable n (%)</b>             | <b>Early HTx (n=60)</b> |                          |                    | <b>Late HTx (n=77)</b> |                          |                    |
|-----------------------------------|-------------------------|--------------------------|--------------------|------------------------|--------------------------|--------------------|
|                                   | <b>AMR<br/>(n=9)</b>    | <b>No AMR<br/>(n=51)</b> | <b>p<br/>value</b> | <b>CAV<br/>(n=14)</b>  | <b>No CAV<br/>(n=63)</b> | <b>p<br/>value</b> |
| <b>Total patients<br/>n = 137</b> |                         |                          |                    |                        |                          |                    |
| <b>Age at HTx (yrs)</b>           | <b>50.1 ±<br/>13.4</b>  | <b>53.3 ± 11.8</b>       | <b>0.25</b>        | <b>58.4 ±<br/>10.6</b> | <b>56.1 ± 9.2</b>        | <b>0.32</b>        |
| <b>Male<br/>Gender(M:F)</b>       | <b>7 :2</b>             | <b>40:11</b>             | <b>0.18</b>        | <b>11:3</b>            | <b>49:14</b>             | <b>0.29</b>        |
| <b>Ethnicity</b>                  |                         |                          |                    |                        |                          |                    |
| <b>Caucasian</b>                  | <b>7</b>                | <b>35</b>                | <b>0.12</b>        | <b>11</b>              | <b>43</b>                | <b>0.67</b>        |
| <b>African<br/>American</b>       | <b>2</b>                | <b>7</b>                 | <b>0.17</b>        | <b>2</b>               | <b>10</b>                | <b>0.35</b>        |
| <b>Other</b>                      | <b>0</b>                | <b>2</b>                 | <b>1.0</b>         | <b>1</b>               | <b>2</b>                 | <b>0.43</b>        |
| <b>LVAD prior to<br/>HTx</b>      | <b>2</b>                | <b>8</b>                 | <b>0.71</b>        | <b>3</b>               | <b>16</b>                | <b>0.12</b>        |
| <b>Mean f/u time<br/>(yrs)</b>    | <b>1.6 ± 0.9</b>        | <b>1.7 ± 0.7</b>         | <b>0.55</b>        | <b>8.9 ± 4.9</b>       | <b>10.3 ± 6.5</b>        | <b>0.31</b>        |

Values presented as mean ± stdev or (%)

**Supplementary Table 2: Increased levels of Abs to Col-V and KAT are significantly associated with the development of DSA in AMR following HTx**

| <b>Col-V</b> |                  | <b>DSA+</b>       | <b>DSA-</b>       | <b>P value</b> |
|--------------|------------------|-------------------|-------------------|----------------|
|              | <b>AMR+</b>      | 344 ± 94<br>(n=7) | 176 ± 65<br>(n=2) | 0.03           |
| <b>AMR-</b>  | 61 ± 28<br>(n=8) | 56 ± 21<br>(n=36) | 0.92              |                |
| <b>KAT</b>   |                  | <b>DSA+</b>       | <b>DSA-</b>       | <b>P value</b> |
|              | <b>AMR+</b>      | 296 ± 71<br>(n=7) | 91 ± 42<br>(n=2)  | 0.003          |
| <b>AMR-</b>  | 67 ± 24<br>(n=8) | 59 ± 17<br>(n=36) | 0.89              |                |

**Supplementary Table 3: Increased levels of Abs to Col-V and KAT are significantly associated with the development of DSA in patients with CAV following HTx**

|              |             | <b>DSA+</b>         | <b>DSA-</b>         | <b>P value</b> |
|--------------|-------------|---------------------|---------------------|----------------|
| <b>Col-V</b> | <b>CAV+</b> | 812 ± 142<br>(n=11) | 313 ± 134<br>(n=3)  | 0.001          |
|              | <b>CAV-</b> | 264 ± 76<br>(n=15)  | 211 ± 87<br>(n=40)  | 0.83           |
| <b>KAT</b>   | <b>CAV+</b> | 796 ± 210<br>(n=11) | 220 ± 78<br>(n=3)   | 0.02           |
|              | <b>CAV-</b> | 196 ± 67<br>(n=15)  | 134 ± 104<br>(n=40) | 0.88           |
